# Supplementary material
Source: PubMed Central journal article supplement (PMC11023923)
Supplement: mmc1.pdf [file mmc1.pdf]

**The American Journal of Human Genetics, Volume 111**

**Supplemental information**

**The association of cigarette smoking  
with DNA methylation and gene expression  
in human tissue samples**

**James L. Li, Niyati Jain, Lizeth I. Tamayo, Lin Tong, Farzana Jasmine, Muhammad G. Kibriya, Kathryn Demanelis, Meritxell Oliva, Lin S. Chen, and Brandon L. Pierce**

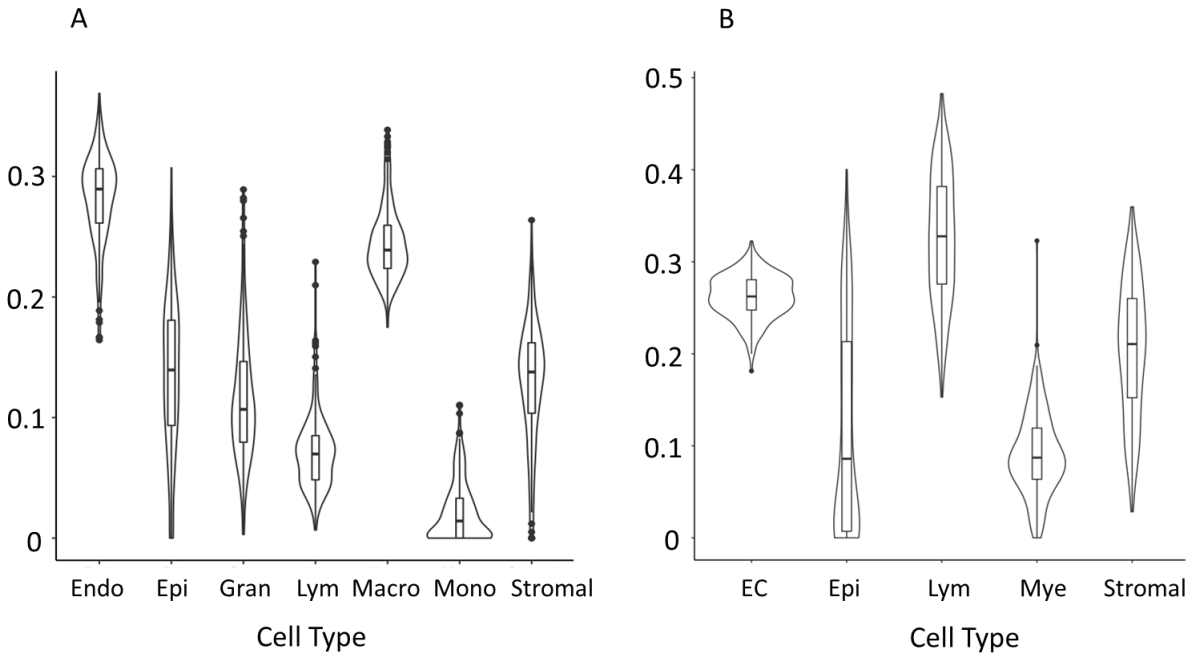

**Figure S1. Distribution of cell type percentages**

(A) Estimated cell type percentages for lung using the EPISCORE method with the pan-tissue DNAm atlas as a reference dataset (B) Estimated cell type percentages for colon using the EPISCORE method with the pan-tissue DNAm atlas as a reference dataset.

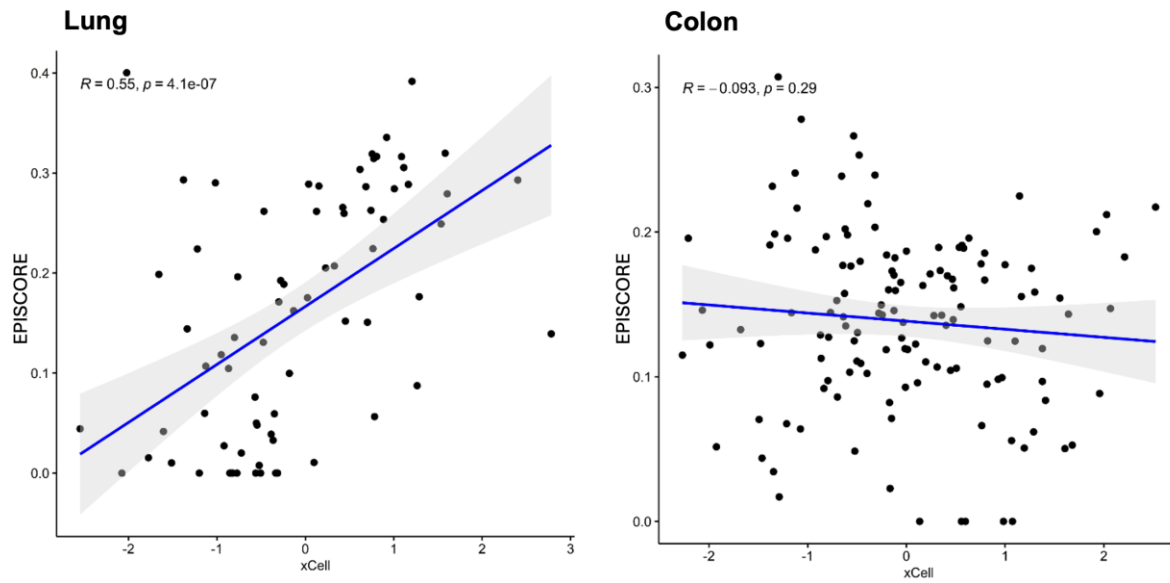

**Figure S2. Correlation between EPISCORE and xCell cell type proportions**

(A) Spearman correlation between EPISCORE and xCell computed epithelial cell proportions for lung. (B) Spearman correlation between EPISCORE and xCell computed epithelial cell proportions for colon.

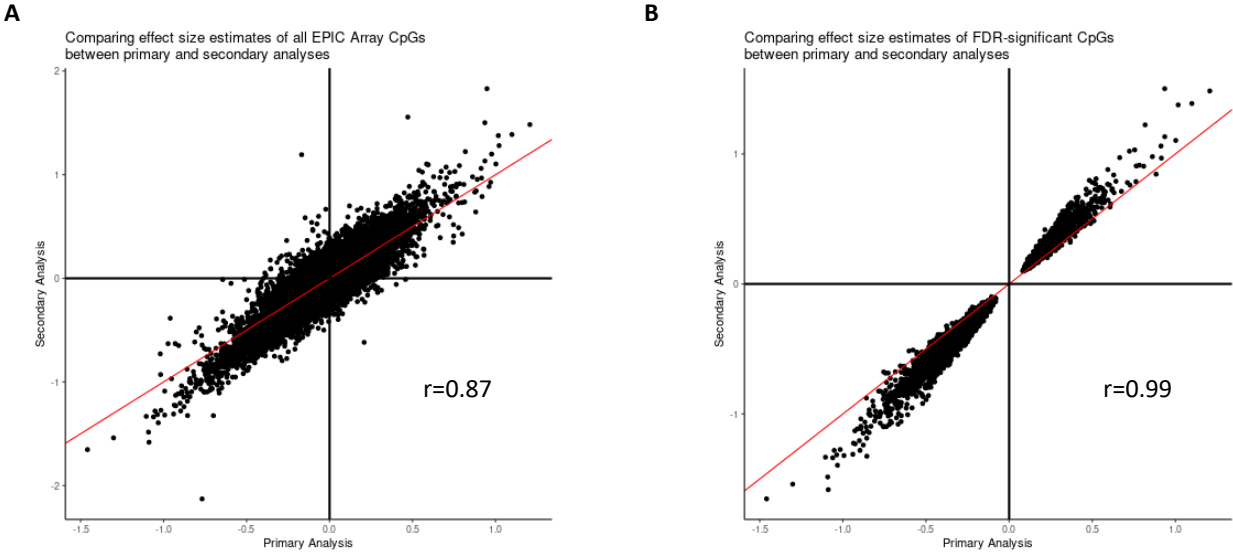

**Figure S3. Comparison of effect size estimates between the primary EWAS and secondary EWAS analysis**

Scatterplot comparing effect size estimates of each CpG between the EWAS of ever vs. never smokers (primary analysis) and current vs. never smokers (secondary analysis) in lung tissue for A) All CpGs on the EPIC Array and B) CpGs that were significantly associated with smoking at an FDR of 0.05.

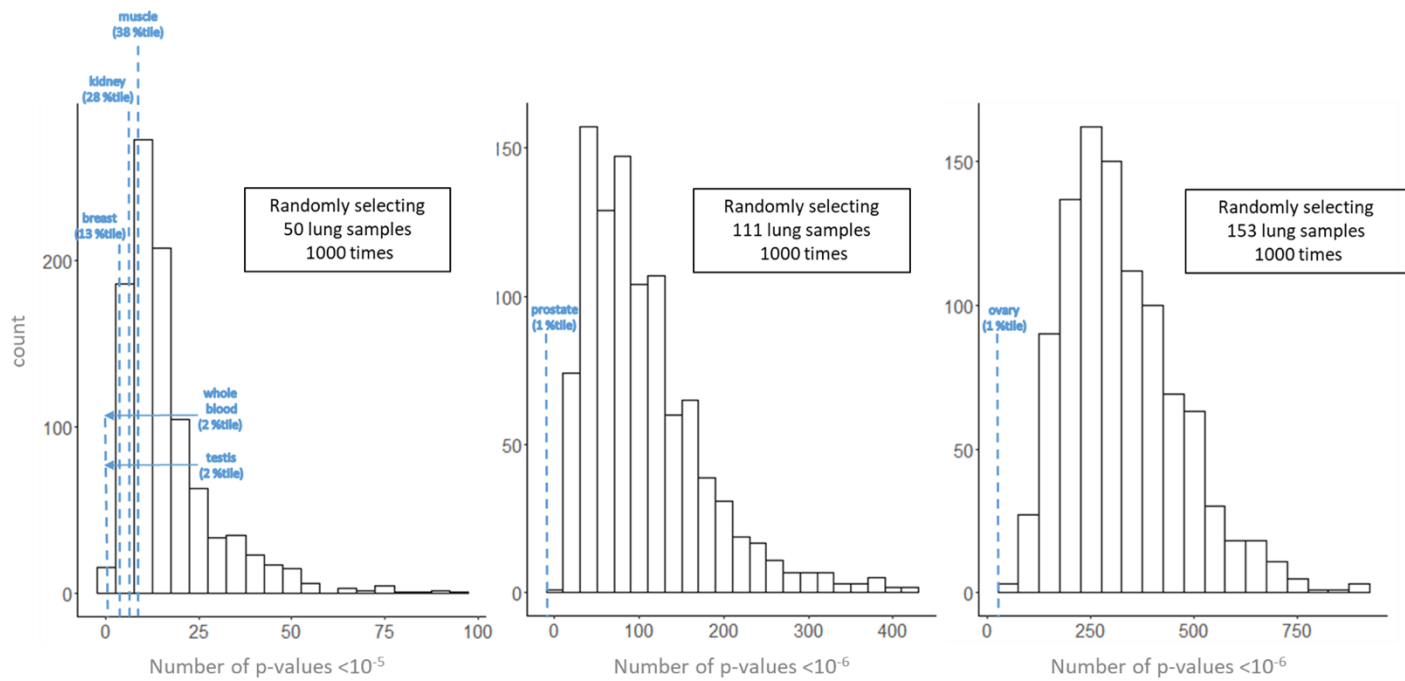

**Figure S4. Lung shows more prominent effects of smoking than other tissue types.** Number of smoking-associated CpGs in lung compared to the number in other tissues that pass p-value thresholds after down sampling to sample sizes of  $n=50$ ,  $n=111$ , and  $n=153$ . Each distribution shown is generated by randomly selecting samples from the 212 lung samples (and conducting EWAS analyses) 1000 times.



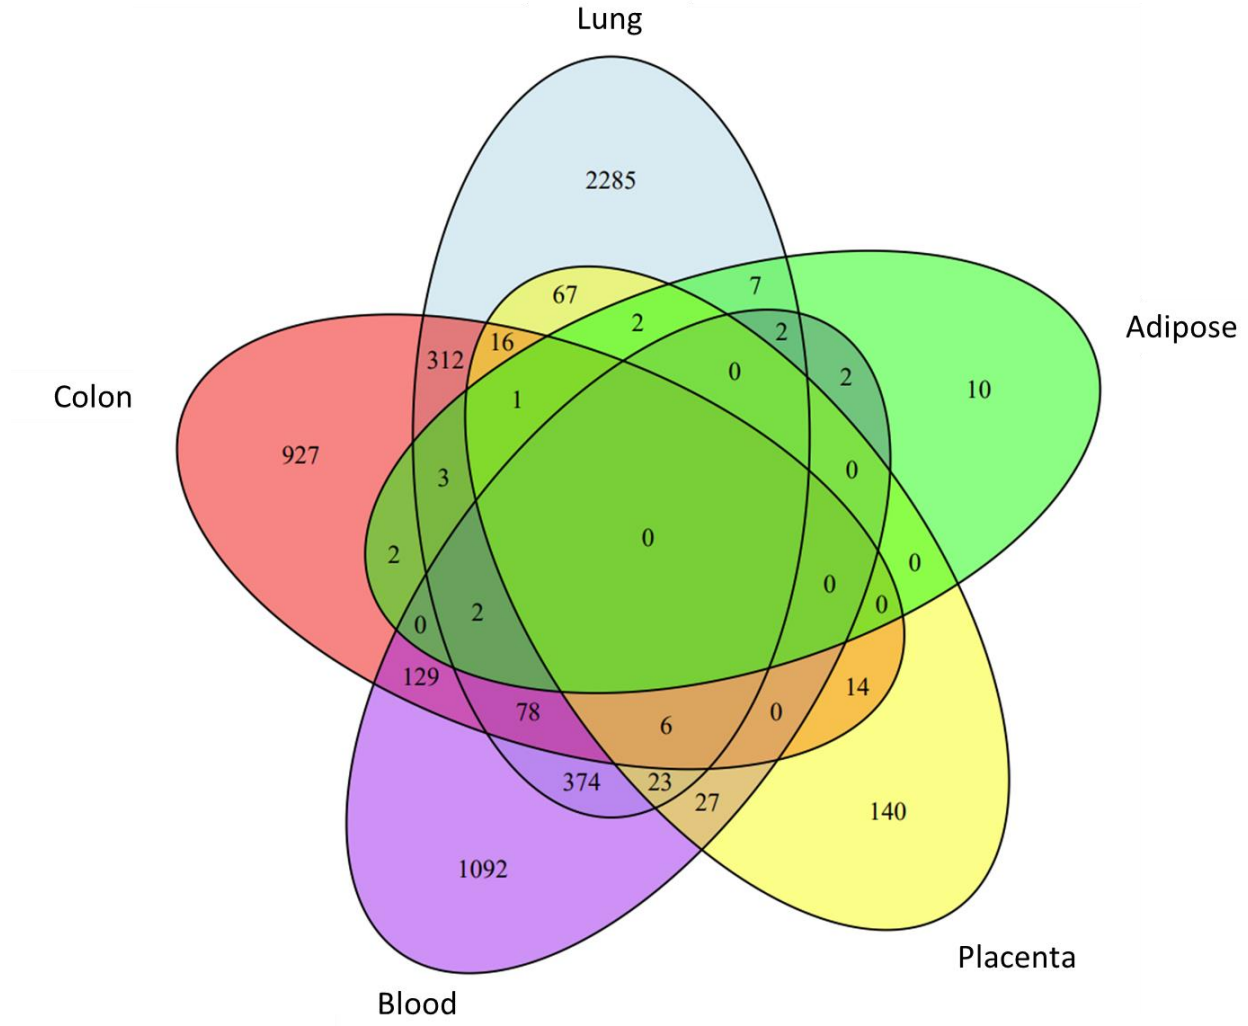

**Figure S6. Venn diagram of the genes annotated to smoking-associated CpGs previously identified in EWAS conducted in different tissue types**

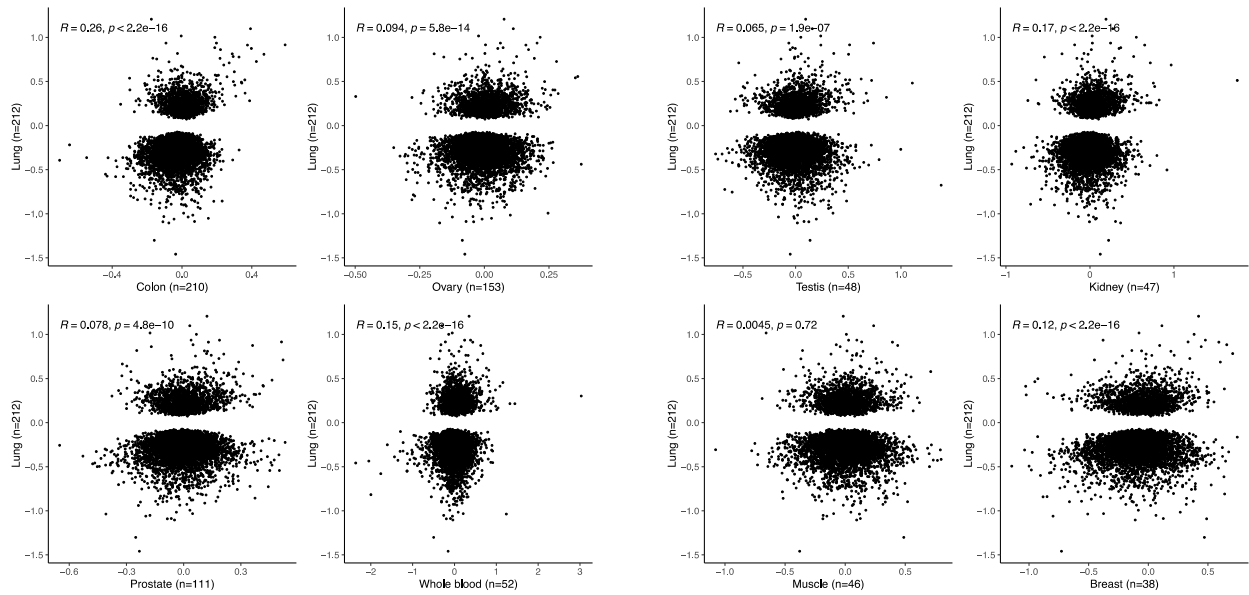

**Figure S7. Comparison of effect size estimates between pairs of tissue types**

Scatterplots showing the correlations between association estimates observed across pairs of tissue types. Smoking-associated CpGs that pass FDR 0.05 in lung are shown on the vertical axes, with all other tissues shown on the horizontal axes.



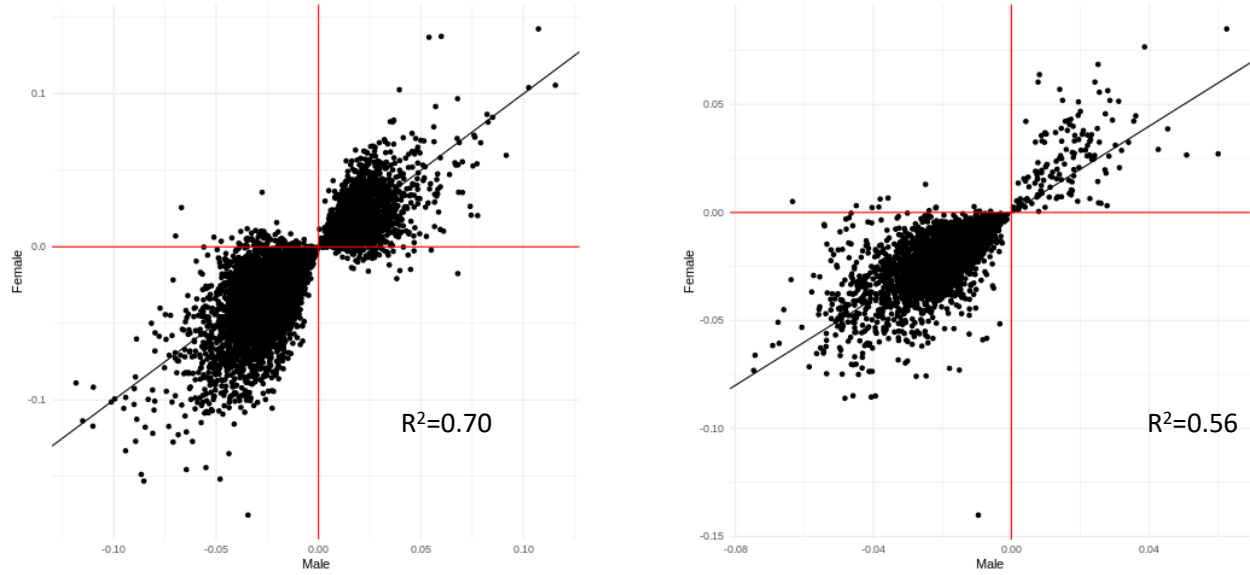

**Figure S8. Comparison of effect size estimates between females and males**

Scatterplot comparing effect size estimates of each CpG when stratifying by sex for all CpGs that were significantly associated with smoking at an FDR of 0.05 in lung (left) and in colon (right). Black line represents the identity line.

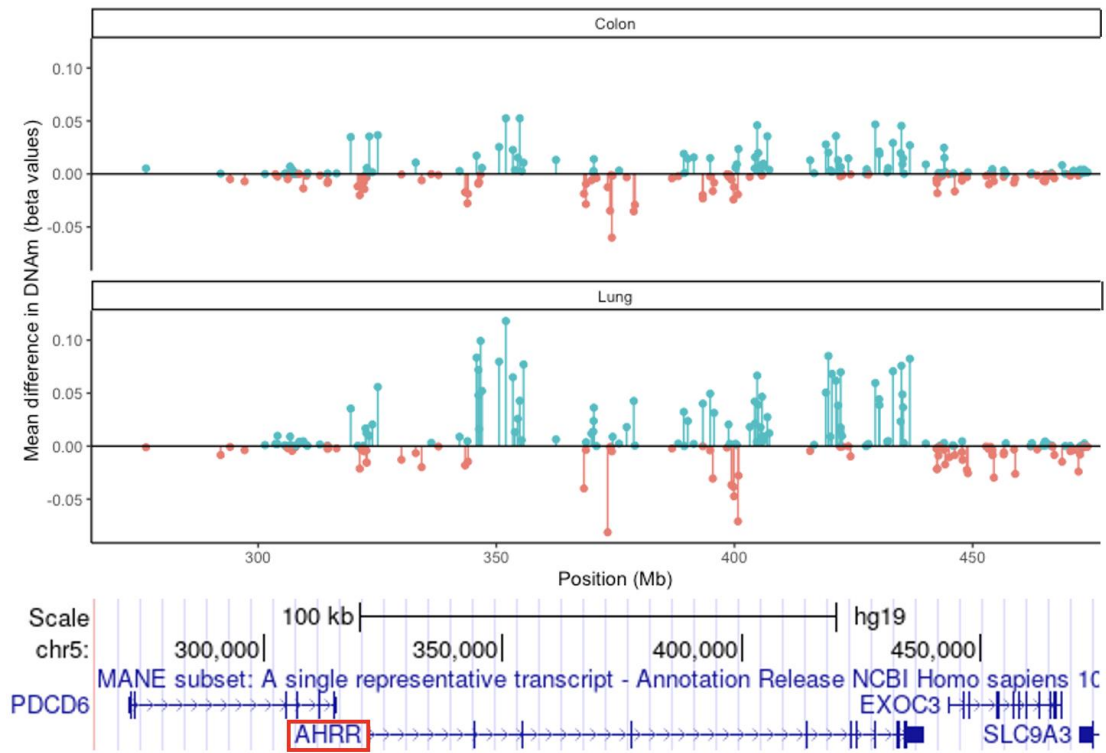

**Figure S9. Difference in DNAm beta values between smokers and non-smokers across CpGs measured around the AHRH gene.**

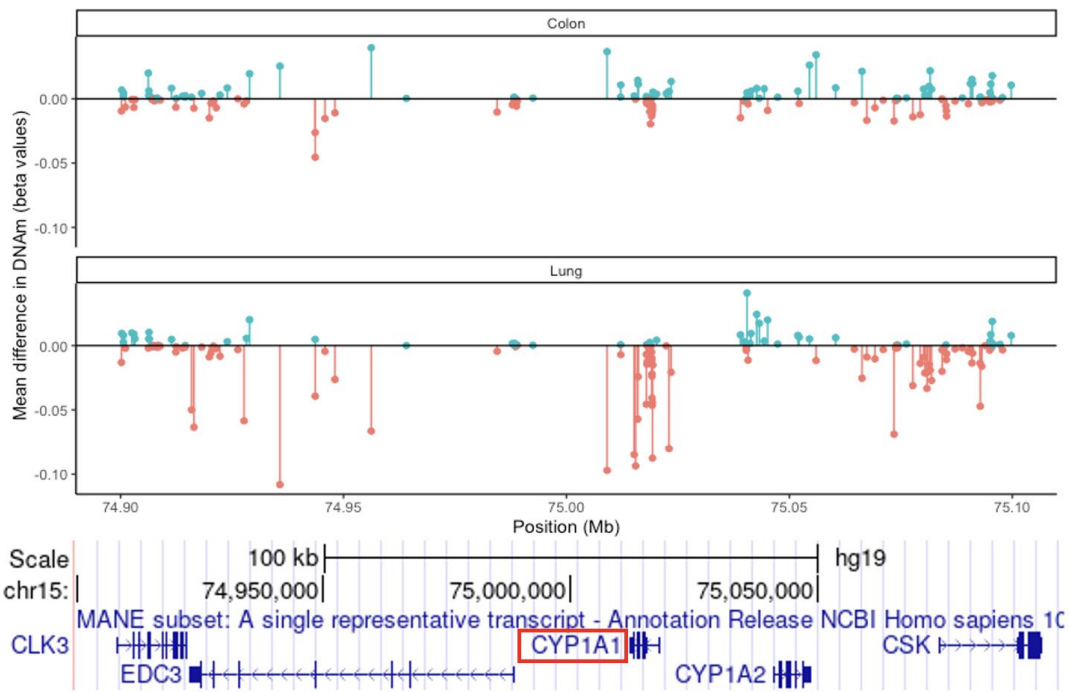

**Figure S10. Difference in DNAm beta values between smokers and non-smokers across CpGs measured around the CYP1A1 gene.**

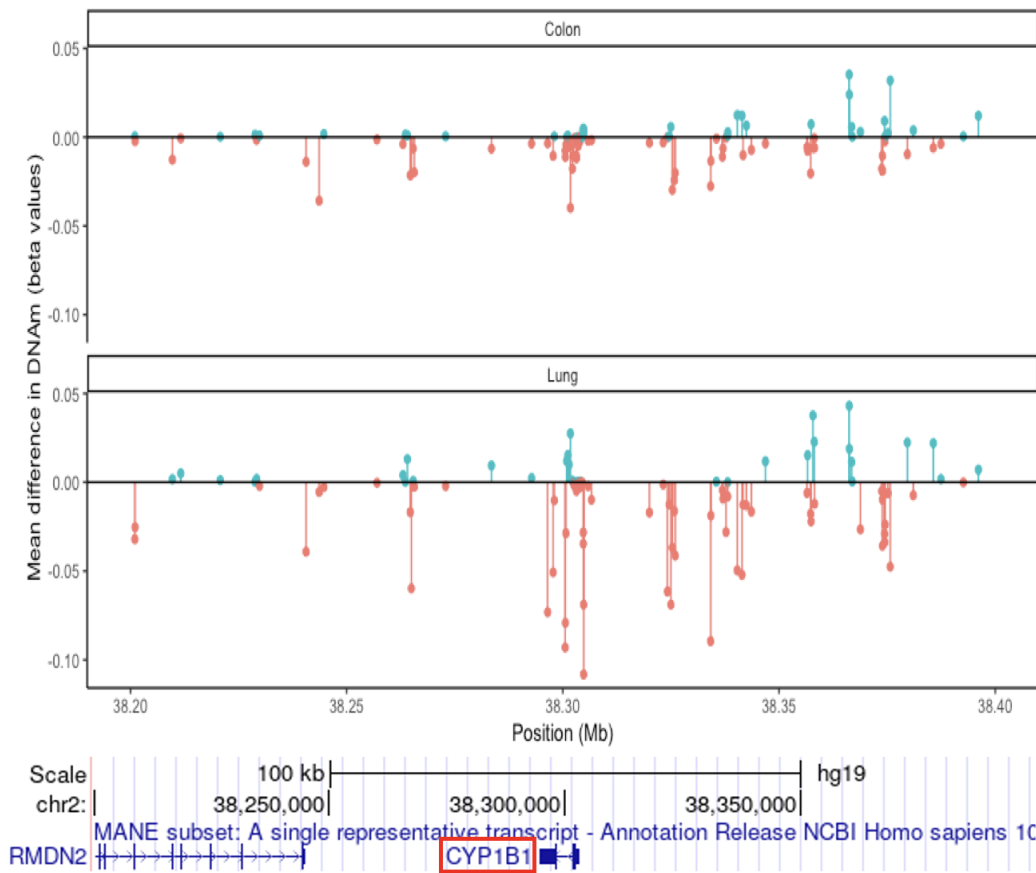

**Figure S11. Difference in DNAm beta values between smokers and non-smokers across CpGs measured around the CYP1B1 gene.**

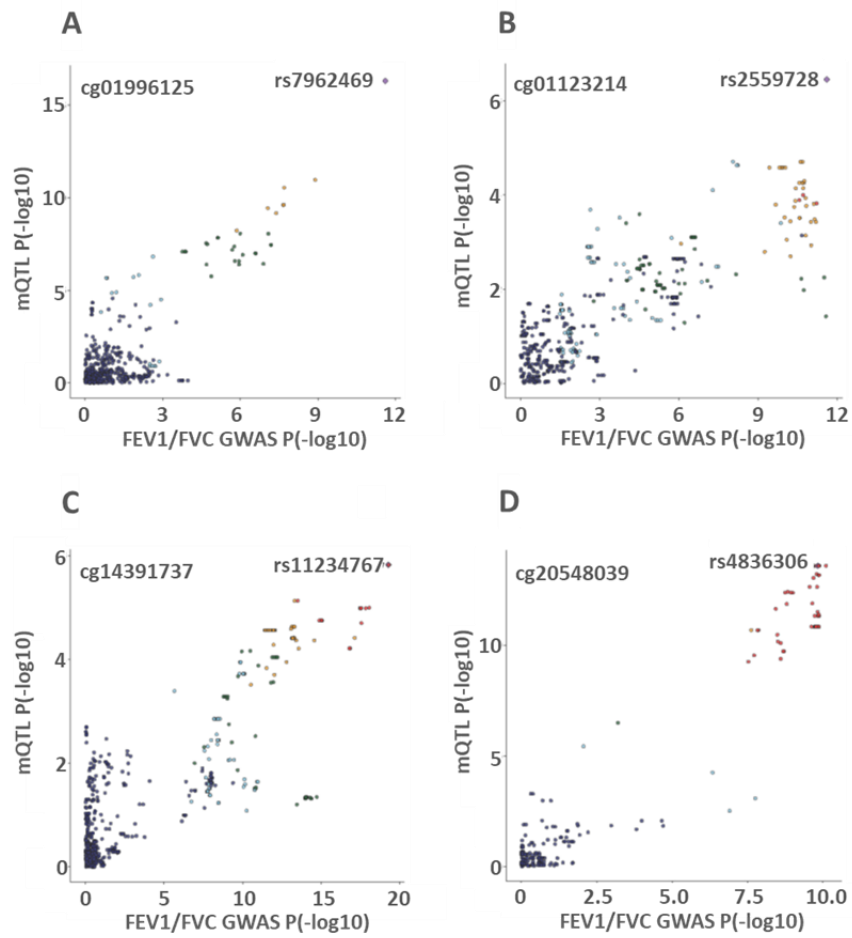

**Figure S12. Comparison of P-values for mQTLs vs FEV1/FVC GWAS signals**  
 Scatter plot of P-values for mQTL signals vs. FEV1/FVC GWAS signals for four loci with mQTL/GWAS co-localization including (A) ACVR1B, (B) SFTPA1, (C) PRSS23, and (D) MARCHF3/MARCH3

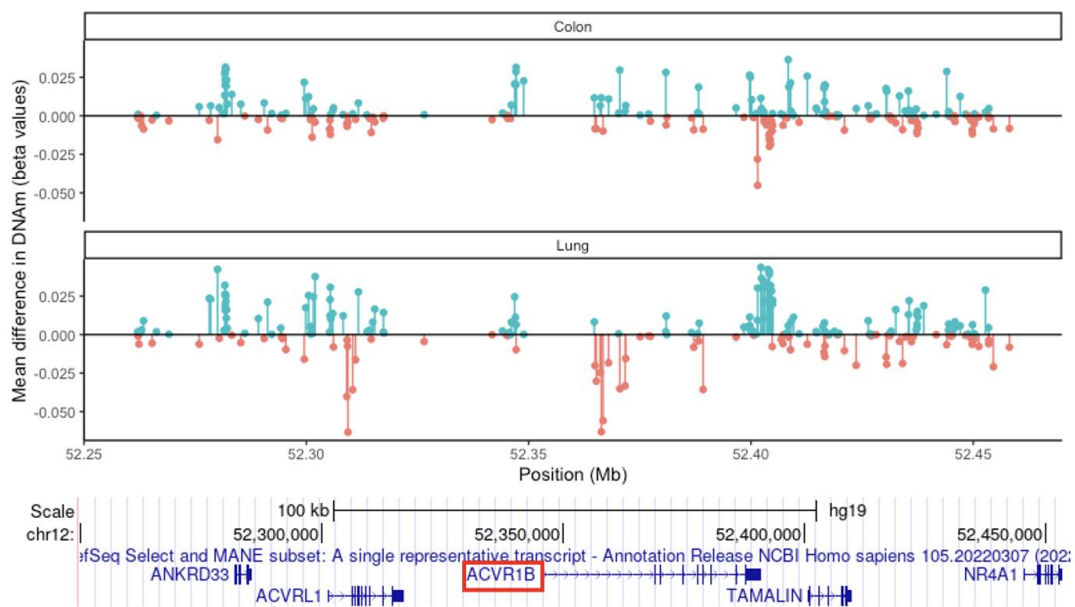

**Figure S13. Difference in DNAm beta values between smokers and non-smokers across CpGs measured around the ACVR1B gene.**

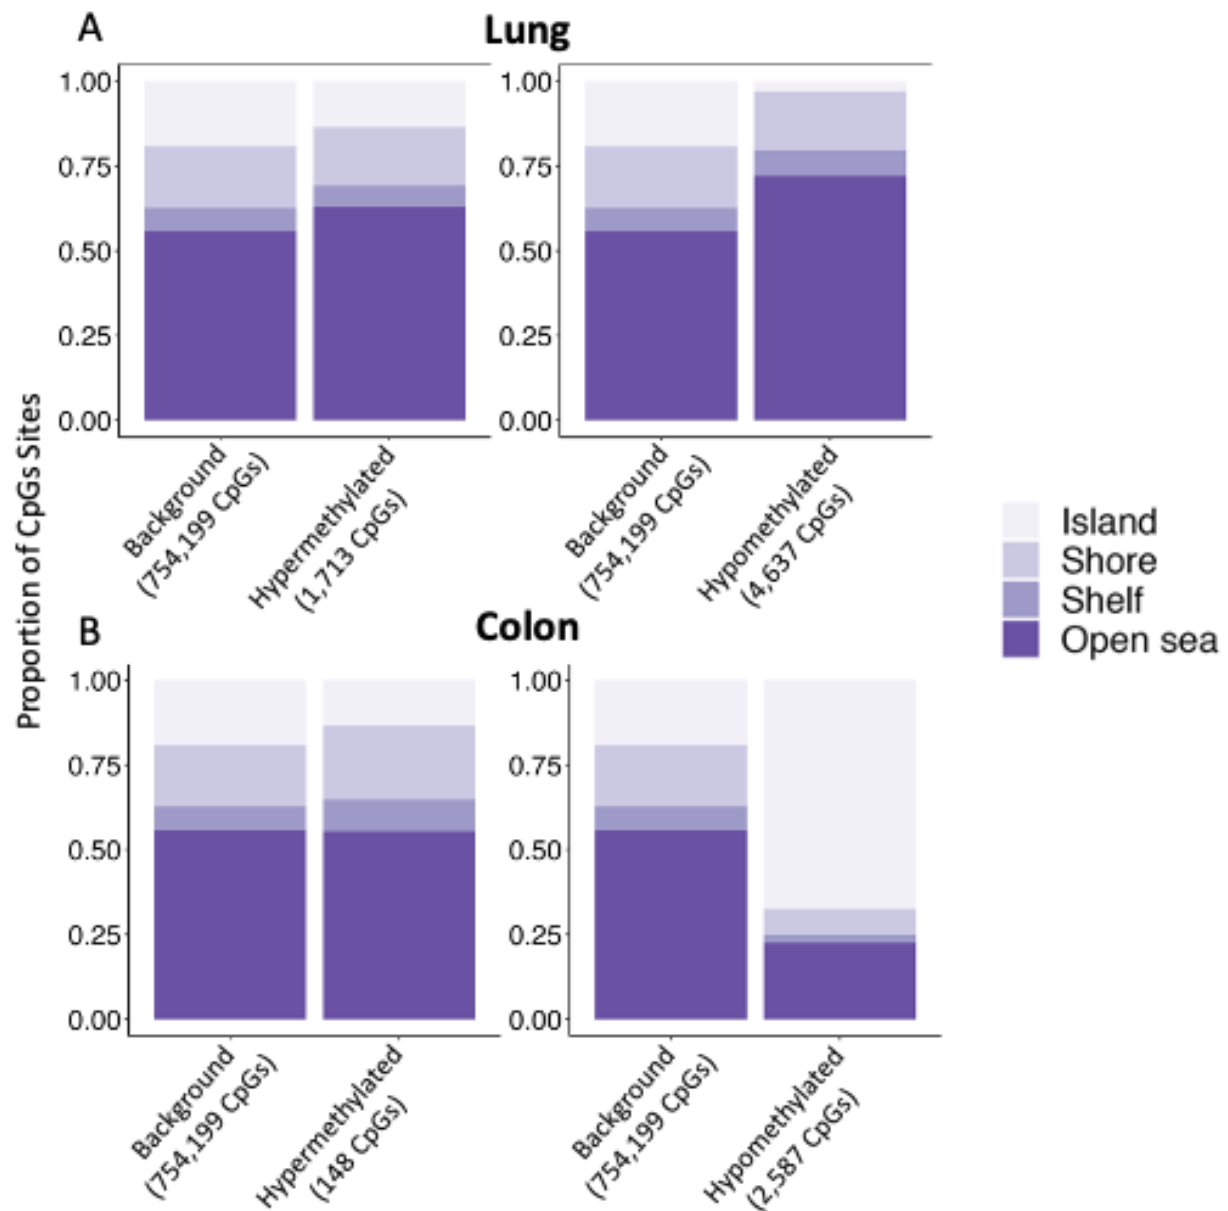

**Figure S14. Enrichment of smoking-related CpGs in relation to CpG Island status**

Locational distribution of significant smoking-related CpGs sites (FDR < 0.05) in relation to CpG islands in (A) lung tissue (B) colon tissue. Colors represent location of CpG site. Background: All CpGs assayed in the Infinium MethylationEPIC array included in our analyses.

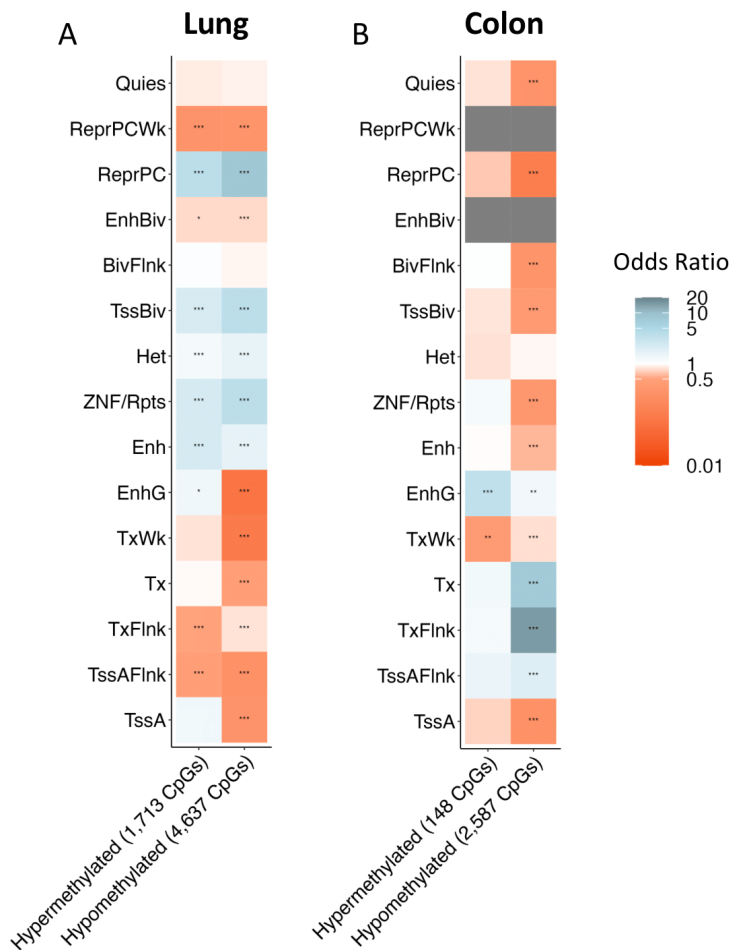

**Figure S15. Enrichment of smoking-related CpG sites among chromatin segmentation features**

Enrichment of smoking-related CpG sites (FDR <0.05) expressed as odd ratios in (A) lung tissue (B) colon tissue. Fisher's exact P value \* < 0.05, \*\* <0.01, \*\*\* <0.001. Active chromatin states: active transcription start site (*TssA*), flanking active TSS (*TssAFlnk*), transcription at gene 5' and 3' showing both promoter and enhancer (*TxFlnk*), strong transcription (Tx), weak transcription (*TxWk*), genic enhancers (*EnhG*), enhancers (*Enh*), zinc finger protein genes and repeats (*ZNF/Rpts* ZNF). Inactive chromatin states: heterochromatin (*Het*), bivalent/poised TSS (*TssBiv*), flanking bivalent TSS/Enh (*BivFlnk*), bivalent enhancer (*EnhBiv*), repressed polycomb (*ReprPC*), weak repressed polycomb (*ReprPCWk*), quiescent/low (*Quies*).



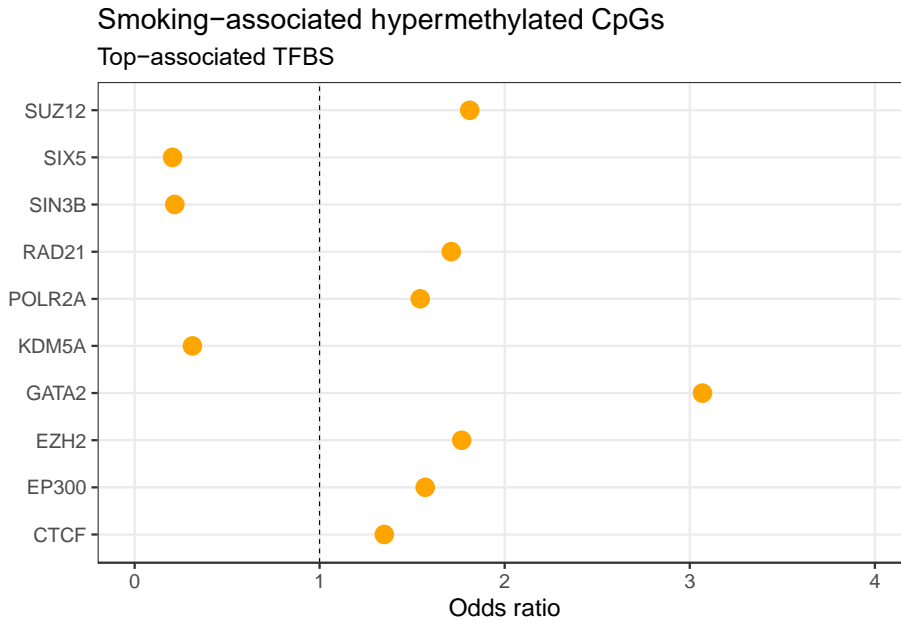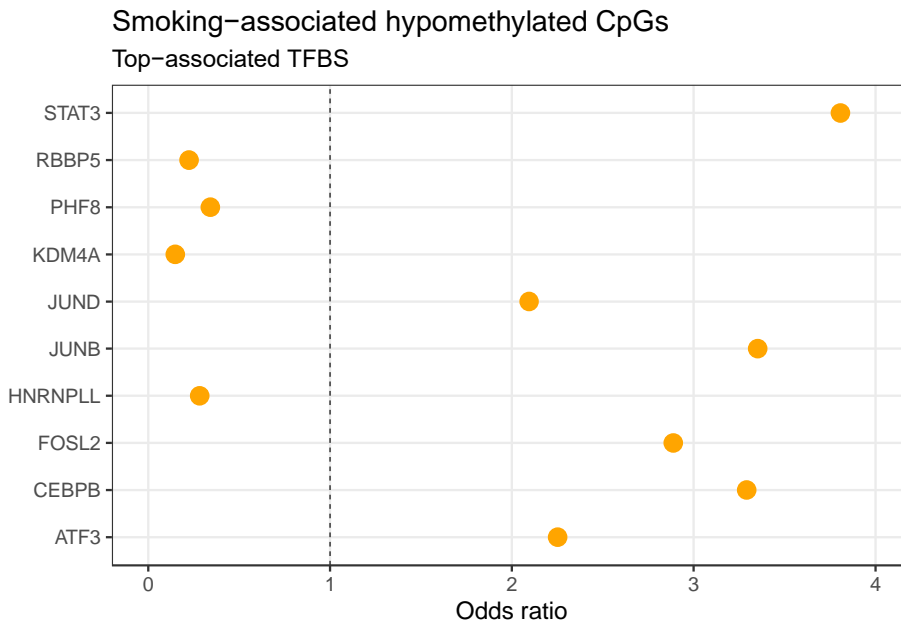

**Figure S16. Enrichment of lung smoking-associated CpGs in transcription factor binding sites.**

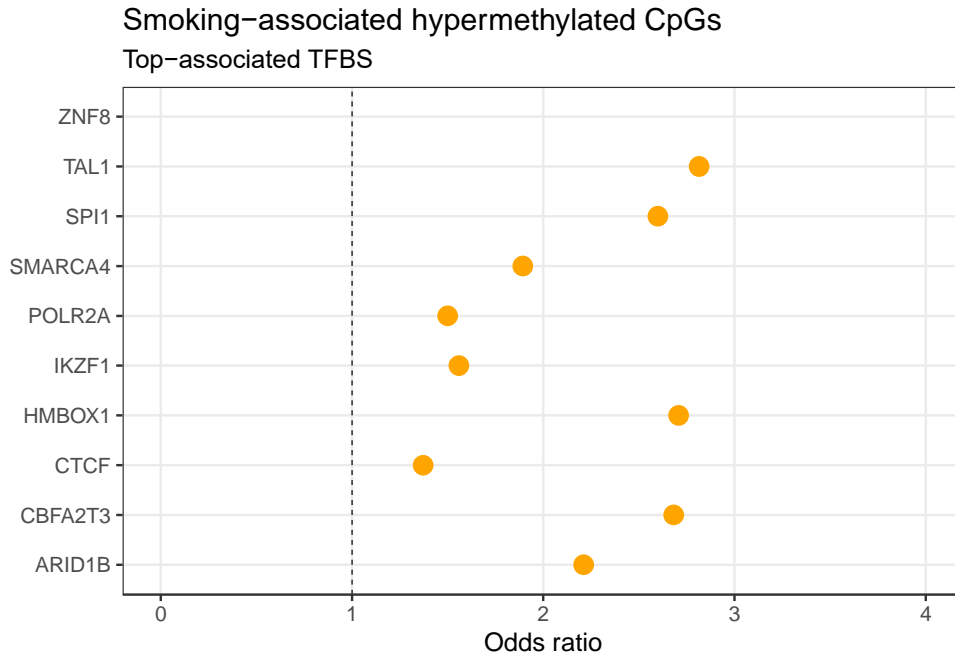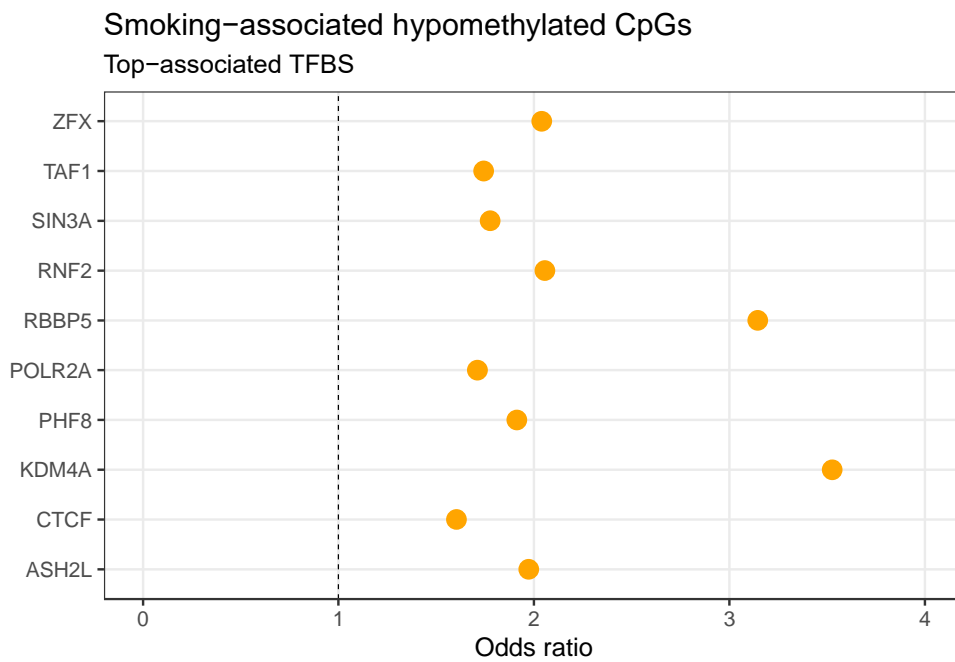

**Figure S17. Enrichment of colon smoking-associated CpGs in transcription factor binding sites.**

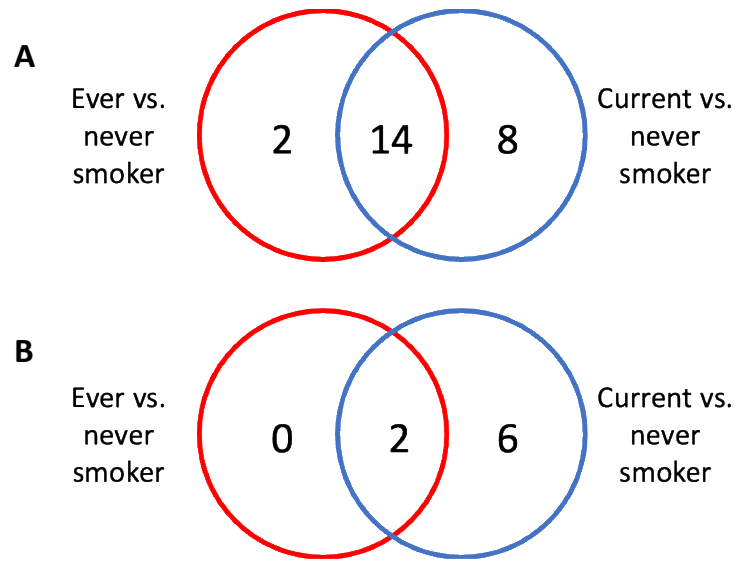

**Figure S18. Comparison of the number of Hallmark gene sets and KEGG pathways**

Venn diagrams comparing the number of A) Hallmark gene sets and B) KEGG pathways identified in the primary vs. secondary EWAS analysis in lung tissue.

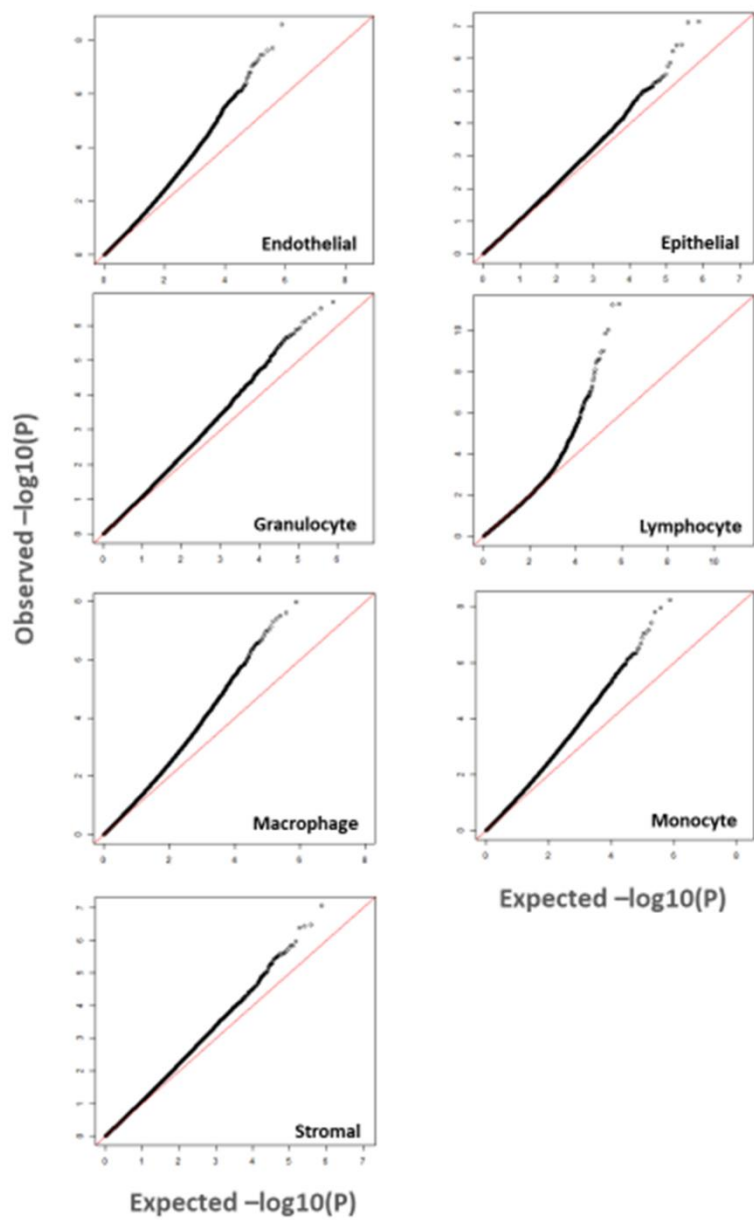

Figure S19. Q-Q plots for smoking by cell-type interactions in lung

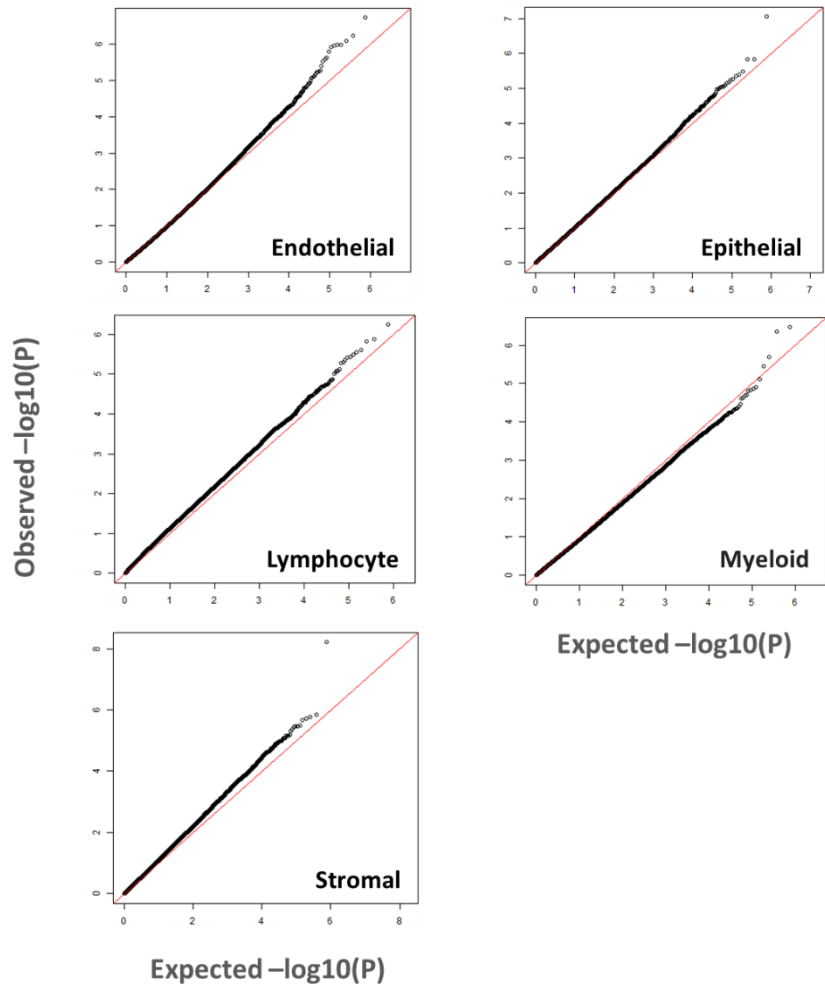

Figure S20. Q-Q plots for smoking by cell-type interactions in colon

**Table S1.** Correlations between EPISCORE estimates of cell type proportions with DNAm-derived SVs in lung and colon. Endo: endothelial, Epi: epithelial, Gran: granulocytes, Lym: lymphocytes, Macro: macrophages, Mono: monocytes, Stromal: stromal cells, EC: enteroendocrine cells, Mye: myeloid cells

**Lung**

| <b>Pearson Correlation Coefficients and P-values, n = 212</b> |            |            |            |            |            |            |            |            |            |             |
|---------------------------------------------------------------|------------|------------|------------|------------|------------|------------|------------|------------|------------|-------------|
| <b>Cell Types</b>                                             | <b>SV1</b> | <b>SV2</b> | <b>SV3</b> | <b>SV4</b> | <b>SV5</b> | <b>SV6</b> | <b>SV7</b> | <b>SV8</b> | <b>SV9</b> | <b>SV10</b> |
| <b>Endo</b>                                                   | -0.28      | -0.4       | 0.47       | -0.48      | -0.15      | -0.19      | 0.31       | -0.14      | 0.003      | 0.12        |
|                                                               | <.0001     | <.0001     | <.0001     | <.0001     | 0.03       | 0.006      | <.0001     | 0.05       | 0.97       | 0.09        |
| <b>Epi</b>                                                    | -0.49      | -0.65      | -0.37      | 0.15       | 0.28       | 0.02       | 0.02       | -0.06      | 0.05       | -0.08       |
|                                                               | <.0001     | <.0001     | <.0001     | 0.03       | <.0001     | 0.73       | 0.73       | 0.41       | 0.44       | 0.25        |
| <b>Gran</b>                                                   | 0.59       | 0.65       | 0.27       | 0.02       | -0.05      | 0.003      | 0.03       | 0.001      | -0.11      | -0.03       |
|                                                               | <.0001     | <.0001     | <.0001     | 0.72       | 0.46       | 0.96       | 0.65       | 0.99       | 0.1        | 0.68        |
| <b>Lym</b>                                                    | 0.17       | 0.58       | -0.34      | 0.28       | -0.42      | -0.14      | 0.11       | 0.04       | -0.09      | 0.22        |
|                                                               | 0.01       | <.0001     | <.0001     | <.0001     | <.0001     | 0.05       | 0.11       | 0.59       | 0.21       | 0.001       |
| <b>Macro</b>                                                  | 0.74       | 0.48       | -0.04      | 0.01       | 0.2        | 0.06       | 0.02       | 0.11       | 0.01       | 0.03        |
|                                                               | <.0001     | <.0001     | 0.59       | 0.94       | 0          | 0.39       | 0.75       | 0.12       | 0.88       | 0.66        |
| <b>Mono</b>                                                   | 0.62       | 0.62       | 0.01       | 0.07       | 0.1        | 0.02       | -0.13      | -0.04      | -0.02      | 0.06        |
|                                                               | <.0001     | <.0001     | 0.9        | 0.29       | 0.14       | 0.75       | 0.06       | 0.56       | 0.78       | 0.37        |
| <b>Stromal</b>                                                | -0.67      | -0.55      | 0.05       | -0.07      | -0.1       | 0.14       | -0.31      | 0.1        | 0.11       | -0.14       |
|                                                               | <.0001     | <.0001     | 0.48       | 0.3        | 0.17       | 0.04       | <.0001     | 0.13       | 0.12       | 0.04        |

**Colon**

| <b>Pearson Correlation Coefficients and P-values, n = 209</b> |            |            |            |            |            |            |            |            |            |             |
|---------------------------------------------------------------|------------|------------|------------|------------|------------|------------|------------|------------|------------|-------------|
| <b>Cell Types</b>                                             | <b>SV1</b> | <b>SV2</b> | <b>SV3</b> | <b>SV4</b> | <b>SV5</b> | <b>SV6</b> | <b>SV7</b> | <b>SV8</b> | <b>SV9</b> | <b>SV10</b> |
| <b>EC</b>                                                     | -0.12      | -0.59      | 0.13       | -0.04      | -0.09      | -0.08      | -0.23      | 0.19       | -0.14      | 0.12        |
|                                                               | 0.08       | <.0001     | 0.06       | 0.52       | 0.21       | 0.23       | 0.0009     | 0.01       | 0.05       | 0.08        |
| <b>Epi</b>                                                    | <.0001     | -0.6       | 0.14       | -0.04      | -0.02      | -0.01      | 0.05       | -0.005     | -0.07      | -0.06       |
|                                                               | <.0001     | <.0001     | 0.05       | 0.61       | 0.73       | 0.93       | 0.47       | 0.95       | 0.34       | 0.42        |
| <b>Lym</b>                                                    | -0.35      | 0.69       | -0.18      | 0.15       | 0.11       | 0.16       | 0.19       | 0.03       | 0.07       | -0.15       |
|                                                               | <.0001     | <.0001     | 0.01       | 0.03       | 0.1        | 0.02       | 0.01       | 0.7        | 0.34       | 0.04        |
| <b>Mye</b>                                                    | 0.17       | 0.76       | -0.18      | 0.14       | 0.23       | 0.26       | -0.09      | -0.1       | 0.15       | 0.13        |
|                                                               | 0.01       | <.0001     | 0.01       | 0.05       | 0.0009     | 0.0001     | 0.21       | 0.16       | 0.03       | 0.06        |
| <b>Stromal</b>                                                | -0.86      | -0.02      | 0.04       | -0.16      | -0.18      | -0.28      | -0.13      | -0.02      | -0.01      | 0.11        |
|                                                               | <.0001     | 0.75       | 0.61       | 0.02       | 0.01       | <.0001     | 0.07       | 0.79       | 0.89       | 0.12        |

**Table S2a.** Number of smoking-associated CpG Sites in the primary analysis of ever vs. never smokers detected in each tissue type (and the tissue-specific P-value threshold) based on false-discovery rates (FDR) of 0.01 and 0.05.

| Tissue             | FDR adjusted P-value threshold |                |
|--------------------|--------------------------------|----------------|
|                    | 0.01                           | 0.05           |
| lung (n=212)       | 2,478 (3.3e-5)                 | 6,350 (0.0004) |
| colon (n=209)      | 662 (8.8e-6)                   | 2,735 (0.0001) |
| ovary (n=153)      | 0 (N/A)                        | 0 (N/A)        |
| prostate (n=111)   | 0 (N/A)                        | 0 (N/A)        |
| whole blood (n=52) | 0 (N/A)                        | 0 (N/A)        |
| breast (n=38)      | 0 (N/A)                        | 0 (N/A)        |
| testis (n=48)      | 0 (N/A)                        | 0 (N/A)        |
| kidney (n=47)      | 0 (N/A)                        | 0 (N/A)        |
| muscle (n=46)      | 0 (N/A)                        | 0 (N/A)        |

**Table S2b.** Number of smoking-associated CpG Sites in the secondary analysis of current vs. never smokers.

| Tissue        | Smoking-associated CpG sites<br>(Tissue-specific P-value threshold) |                 |
|---------------|---------------------------------------------------------------------|-----------------|
|               | FDR 0.01                                                            | FDR 0.05        |
| lung (n=151)  | 4,589 (6.11e-5)                                                     | 10,495 (0.0007) |
| colon (n=148) | 923 (1.22e-5)                                                       | 4,797 (0.0003)  |

**Table S3.** Power to detect the effect sizes of smoking-associated CpGs observed in lung at different sample sizes. *Footnote:* cg01584760, cg20291548, cg09138315 are the smoking-associated CpGs with the maximum, median, and minimum effect sizes, respectively.

| CpG        | randomly selected n of samples |       |      |
|------------|--------------------------------|-------|------|
|            | n=150                          | n=100 | n=50 |
| cg01584760 | 982                            | 349   | 0    |
| cg20291548 | 54                             | 4     | 0    |
| cg09138315 | 50                             | 1     | 0    |



**Table S4.** Enrichment of smoking-associated CpGs based on prior studies of blood samples,<sup>1</sup> adipose samples,<sup>2</sup> placenta samples,<sup>3</sup> or reported in lung tissue within the current study (p-values computed through a one-sided two-proportion z-test). Red highlighted cells indicate p-values less than 0.05.

|                    | Blood CpGs<br>(p-value threshold:<br>1E-3) | Lung CpGs<br>(p-value threshold:<br>1E-3) | Adipose CpGs<br>(p-value threshold:<br>1E-3) | Placenta CpGs<br>(p-value threshold:<br>1E-3) | Blood CpGs<br>(p-value threshold:<br>1E-5) | Lung CpGs<br>(p-value threshold:<br>1E-5) | Adipose CpGs<br>(p-value threshold:<br>1E-5) | Placenta CpGs<br>(p-value threshold:<br>1E-5) |
|--------------------|--------------------------------------------|-------------------------------------------|----------------------------------------------|-----------------------------------------------|--------------------------------------------|-------------------------------------------|----------------------------------------------|-----------------------------------------------|
| <b>Breast</b>      | 3.30E-02                                   | 3.49E-08                                  | 1.38E-02                                     | 8.08E-02                                      | 5.00E-01                                   | 5.00E-01                                  | 5.00E-01                                     | 5.00E-01                                      |
| <b>Colon</b>       | 3.09E-47                                   | 5.79E-43                                  | 4.35E-23                                     | 5.00E-01                                      | 1.23E-30                                   | 1.34E-06                                  | 9.10E-17                                     | 4.17E-01                                      |
| <b>Kidney</b>      | 2.83E-02                                   | 1.92E-05                                  | 2.29E-33                                     | 5.00E-01                                      | 5.00E-01                                   | 5.00E-01                                  | 5.00E-01                                     | 5.00E-01                                      |
| <b>Muscle</b>      | 5.00E-01                                   | 3.03E-01                                  | 1.06E-12                                     | 5.00E-01                                      | 5.00E-01                                   | 5.00E-01                                  | 5.00E-01                                     | 5.00E-01                                      |
| <b>Ovary</b>       | 7.22E-05                                   | 4.60E-09                                  | 5.00E-01                                     | 4.26E-01                                      | 5.00E-01                                   | 5.00E-01                                  | 5.00E-01                                     | 5.00E-01                                      |
| <b>Prostate</b>    | 4.65E-01                                   | 2.57E-02                                  | 1.43E-09                                     | 5.00E-01                                      | 5.00E-01                                   | 1.83E-01                                  | 5.00E-01                                     | 5.00E-01                                      |
| <b>Testis</b>      | 5.00E-01                                   | 5.82E-02                                  | 5.00E-01                                     | 5.00E-01                                      | 5.00E-01                                   | 5.00E-01                                  | 5.00E-01                                     | 5.00E-01                                      |
| <b>Whole Blood</b> | 8.16E-46                                   | 2.22E-08                                  | 3.00E-196                                    | 5.00E-01                                      | 5.00E-01                                   | 5.00E-01                                  | 5.00E-01                                     | 5.00E-01                                      |
| <b>Lung</b>        | 7.46E-116                                  | 0.00E+00                                  | 4.44E-265                                    | 1.48E-10                                      | 1.43E-91                                   | 0.00E+00                                  | 0.00E+00                                     | 8.14E-07                                      |

**Table S5.** Genes with associations between smoking and both DNAm and gene expression data at an FDR<0.05 in lung. (table in separate file)

**Table S6.** Genes with associations between smoking and both DNAm and gene expression data at an FDR<0.05 in colon. (table in separate file)

**Table S7.** Colocalization between smoking-associated CpGs in lung (FDR<0.01), mQTLs, and the 10 SNPs reaching genome-wide significance in the UK Biobank FEV1/FVC GWAS. (table in separate file)

**Table S8.** Colocalization between smoking-associated CpGs in colon (FDR<0.05), mQTLs, and genome-wide significant SNPs identified in genome-wide association studies of colon-related diseases. (table in separate file)

**Table S9.** Top hallmark gene sets detected in the primary analysis of hypomethylated smoking-associated CpGs in lung.

| Description                                                    | Genes in gene set | Genes with smoking-associated CpGs* | Enrichment P | FDR-adjusted p-value |
|----------------------------------------------------------------|-------------------|-------------------------------------|--------------|----------------------|
| <b><i>Hallmark Gene Sets</i></b>                               |                   |                                     |              |                      |
| TNF-alpha signaling via NFKb                                   | 199               | 49                                  | 5.01E-07     | 2.50E-05             |
| P53 pathway                                                    | 196               | 46                                  | 5.01E-05     | 1.25E-03             |
| Apoptosis                                                      | 155               | 38                                  | 1.58E-04     | 2.64E-03             |
| Hypoxia                                                        | 190               | 45                                  | 4.68E-04     | 5.85E-03             |
| IL6-JAK-STAT3 signaling                                        | 81                | 20                                  | 9.44E-04     | 9.44E-03             |
| Early response to estrogen                                     | 194               | 49                                  | 1.75E-03     | 1.35E-02             |
| IL2-STAT5 signaling                                            | 194               | 44                                  | 1.90E-03     | 1.35E-02             |
| MTORC1 signaling                                               | 194               | 38                                  | 3.02E-03     | 1.89E-02             |
| Cholesterol homeostasis                                        | 71                | 18                                  | 3.59E-03     | 1.99E-02             |
| TGF-beta signaling                                             | 53                | 17                                  | 6.18E-03     | 2.87E-02             |
| PI3K-AKT-MTOR signaling                                        | 103               | 26                                  | 6.31E-03     | 2.87E-02             |
| Androgen response                                              | 97                | 25                                  | 8.80E-03     | 3.41E-02             |
| Xenobiotic metabolism                                          | 197               | 36                                  | 8.86E-03     | 3.41E-02             |
| Genes down-regulated in response to ultraviolet (UV) radiation | 142               | 40                                  | 1.00E-02     | 3.58E-02             |

\*Genes with CpGs (as assigned by Illumina) that are associated with smoking

**Table S10.** Top hallmark gene sets detected in the pathway analysis of smoking-associated CpGs in colon tissue.

| Hallmark gene sets                   | Genes in gene set | Genes with smoking-associated CpGs <sup>1</sup> | Enrichment P | FDR     |
|--------------------------------------|-------------------|-------------------------------------------------|--------------|---------|
| Epithelial to mesenchymal transition | 192               | 43                                              | 9.59e-8      | 4.80e-6 |
| UV response DN                       | 142               | 30                                              | 2.12e-3      | 0.05    |

<sup>1</sup> Genes with CpGs (as assigned by Illumina) that are associated with smoking

**Table S11.** Top hallmark gene sets and KEGG pathways detected in the secondary analysis of smoking-associated CpGs in lung.

| Description                                                    | Genes in gene set | Genes with smoking-associated CpGs* | Enrichment P | FDR-adjusted p-value |
|----------------------------------------------------------------|-------------------|-------------------------------------|--------------|----------------------|
| <b><i>Hallmark Gene Sets</i></b>                               |                   |                                     |              |                      |
| TNF-alpha signaling via NFKb                                   | 199               | 76                                  | 5.91E-07     | 2.96E-05             |
| P53 pathway                                                    | 196               | 75                                  | 1.42E-05     | 3.54E-04             |
| IL2-STAT5 signaling                                            | 194               | 77                                  | 9.89E-05     | 1.65E-03             |
| Early response to estrogen                                     | 194               | 82                                  | 3.07E-04     | 3.84E-03             |
| Apoptosis                                                      | 155               | 58                                  | 5.66E-04     | 5.57E-03             |
| Complement                                                     | 194               | 69                                  | 6.68E-04     | 5.57E-03             |
| Allograft rejection                                            | 191               | 63                                  | 8.56E-04     | 5.98E-03             |
| IL6-JAK-STAT3 signaling                                        | 81                | 31                                  | 1.06E-03     | 5.98E-03             |
| Xenobiotic metabolism                                          | 197               | 65                                  | 1.08E-03     | 5.98E-03             |
| Inflammatory response                                          | 196               | 62                                  | 1.30E-03     | 6.50E-03             |
| Late response to estrogen                                      | 194               | 72                                  | 1.52E-03     | 6.89E-03             |
| Adipogenesis                                                   | 196               | 65                                  | 1.74E-03     | 7.04E-03             |
| TGF-beta signaling                                             | 53                | 27                                  | 1.92E-03     | 7.04E-03             |
| Cholesterol homeostasis                                        | 71                | 29                                  | 1.97E-03     | 7.04E-03             |
| Genes up-regulated by KRAS activation                          | 192               | 66                                  | 3.01E-03     | 1.00E-02             |
| MTORC1 signaling                                               | 194               | 63                                  | 3.85E-03     | 1.20E-02             |
| Genes down-regulated in response to ultraviolet (UV) radiation | 142               | 65                                  | 4.41E-03     | 1.30E-02             |
| Fatty acid metabolism                                          | 149               | 43                                  | 9.35E-03     | 2.60E-02             |
| Hypoxia                                                        | 190               | 65                                  | 1.53E-02     | 4.02E-02             |
| Interferon gamma response                                      | 200               | 58                                  | 1.67E-02     | 4.16E-02             |
| Apical junction                                                | 193               | 70                                  | 1.82E-02     | 4.34E-02             |
| Bile acid metabolism                                           | 110               | 34                                  | 2.04E-02     | 4.63E-02             |
| <b><i>KEGG Pathways</i></b>                                    |                   |                                     |              |                      |
| Lipid and atherosclerosis                                      | 205               | 79                                  | 6.41E-06     | 2.28E-03             |
| PPAR signaling pathway                                         | 72                | 31                                  | 1.20E-04     | 2.13E-02             |
| Pathways in cancer                                             | 510               | 181                                 | 2.48E-04     | 2.80E-02             |



|                                                     |     |     |          |          |
|-----------------------------------------------------|-----|-----|----------|----------|
| Parathyroid hormone synthesis, secretion and action | 105 | 51  | 3.15E-04 | 2.80E-02 |
| Circadian entrainment                               | 96  | 47  | 5.64E-04 | 4.00E-02 |
| PI3K-Akt signaling pathway                          | 342 | 124 | 1.00E-03 | 4.57E-02 |
| Insulin resistance                                  | 105 | 45  | 1.02E-03 | 4.57E-02 |
| Non-small cell lung cancer                          | 71  | 36  | 1.03E-03 | 4.57E-02 |

---

\*Genes with CpGs (as assigned by Illumina) that are associated with smoking

**Table S12.** CpGs showing strongest evidence of being impacted by the interaction between smoking and estimated cell types.

| Cell-type  | Name       | Chromosome | Position  | Gene             | Interaction Effect |          | Main Effect       |          |
|------------|------------|------------|-----------|------------------|--------------------|----------|-------------------|----------|
|            |            |            |           |                  | log2[Fold Change]  | P-Value  | log2[Fold Change] | P-Value  |
| Lymphocyte | cg26075905 | 14         | 102391388 | <i>PPP2R5C</i>   | 0.22               | 5.10E-12 | 0.06              | 0.08     |
| Lymphocyte | cg17616967 | 2          | 234234525 | <i>SAG</i>       | 0.94               | 5.40E-12 | 0.34              | 0.01     |
| Lymphocyte | cg26848446 | 11         | 3382329   | <i>ZNF195</i>    | 0.48               | 9.20E-11 | 0.23              | 0.002    |
| Lymphocyte | cg12529083 | 12         | 13197360  | <i>KIAA1467</i>  | -0.28              | 1.38E-10 | -0.15             | 0.0006   |
| Lymphocyte | cg12722058 | 15         | 23086394  | <i>NIPA1</i>     | -0.28              | 9.10E-10 | -0.22             | 2.01E-06 |
| Lymphocyte | cg12901038 | 11         | 2815078   | <i>KCNQ1</i>     | 0.39               | 1.15E-09 | 0.13              | 0.05     |
| Lymphocyte | cg09197895 | 14         | 105512268 | N/A              | -0.22              | 2.36E-09 | -0.14             | 0.0001   |
| Lymphocyte | cg04180093 | 7          | 99686359  | <i>COPS6</i>     | -0.52              | 2.70E-09 | -0.24             | 0.007    |
| Lymphocyte | cg12285709 | 14         | 102975664 | <i>ANKRD9</i>    | -0.32              | 2.74E-09 | -0.07             | 0.17     |
| Lymphocyte | cg06509613 | 18         | 53588274  | <i>LINC01416</i> | 0.38               | 3.78E-09 | 0.04              | 0.5      |
| Mono       | cg24096902 | 1          | 27754893  | <i>WASF2</i>     | 0.23               | 5.90E-09 | 0.16              | 8.50E-05 |
| Mono       | cg23606722 | 12         | 133319848 | <i>ANKLE2</i>    | 0.41               | 1.10E-08 | 0.18              | 0.01     |
| Macro      | cg11538937 | 2          | 241559124 | <i>GPR35</i>     | -0.20              | 1.10E-08 | -0.11             | 0.003    |
| Macro      | cg24096902 | 1          | 27754893  | <i>WASF2</i>     | 0.23               | 2.50E-08 | 0.18              | 6.40E-05 |
| Endo       | cg06232680 | 21         | 39608414  | <i>KCNJ15</i>    | 0.346              | 2.60E-09 | -0.049            | 0.367    |
| Endo       | cg14800014 | 5          | 125800764 | <i>GRAMD3</i>    | 0.212              | 1.90E-08 | -0.131            | 0.0003   |

**Footnote:** Abbreviations: Mono, Monocyte; Macro, Macrophage; Endo, Endothelial cell.

**Table S13.** Smoking-by-cell type interaction results for the CpGs in lung showing the strongest evidence of association with smoking in the primary EWAS analysis. (table in separate file)

**References:**

1. Silva CP, Kamens HM. Cigarette smoke-induced alterations in blood: A review of research on DNA methylation and gene expression. *Exp Clin Psychopharmacol*. 2021;29(1):116-135. doi:10.1037/pha0000382
2. Tsai PC, Glastonbury CA, Eliot MN, et al. Smoking induces coordinated DNA methylation and gene expression changes in adipose tissue with consequences for metabolic health. *Clin Epigenetics*. 2018;10(1):126. doi:10.1186/s13148-018-0558-0
3. Everson TM, Vives-Usano M, Seyve E, et al. Placental DNA methylation signatures of maternal smoking during pregnancy and potential impacts on fetal growth. *Nat Commun*. 2021;12(1):5095. doi:10.1038/s41467-021-24558-y
